# Supplementary material for: The synthesis and characterization of a series of bis-bidentate Schiff base ligands and their coordination complexes with silver(i), copper(i) and zinc(ii) d10 metal ionsElectronic supplementary information (ESI) available: Views of the crystal structures of ligands of 1, 2 and 3. See http://www.rsc.org/suppdata/nj/b3/b301632c/
Source: Royal Society of Chemistry journal article supplement (doi:10.1039/b301632c), 2003-01-01
Supplement: b301632c.doc [file b301632c.doc]

**The synthesis and characterization of a series of bis-bidentate Schiff base ligands and their coordination complexes with silver(I), copper(I) and zinc(II) d10 metal ions**

**Goutam Kumar Patra and Israel Goldberg***

*School of Chemistry, Sackler Faculty of Exact Sciences, Tel Aviv University*

*69978 Ramat Aviv, Tel Aviv, Israel. E-mail:* [*goldberg@post.tau.ac.il*](mailto:goldberg@post.tau.ac.il)

Supplementary Figures


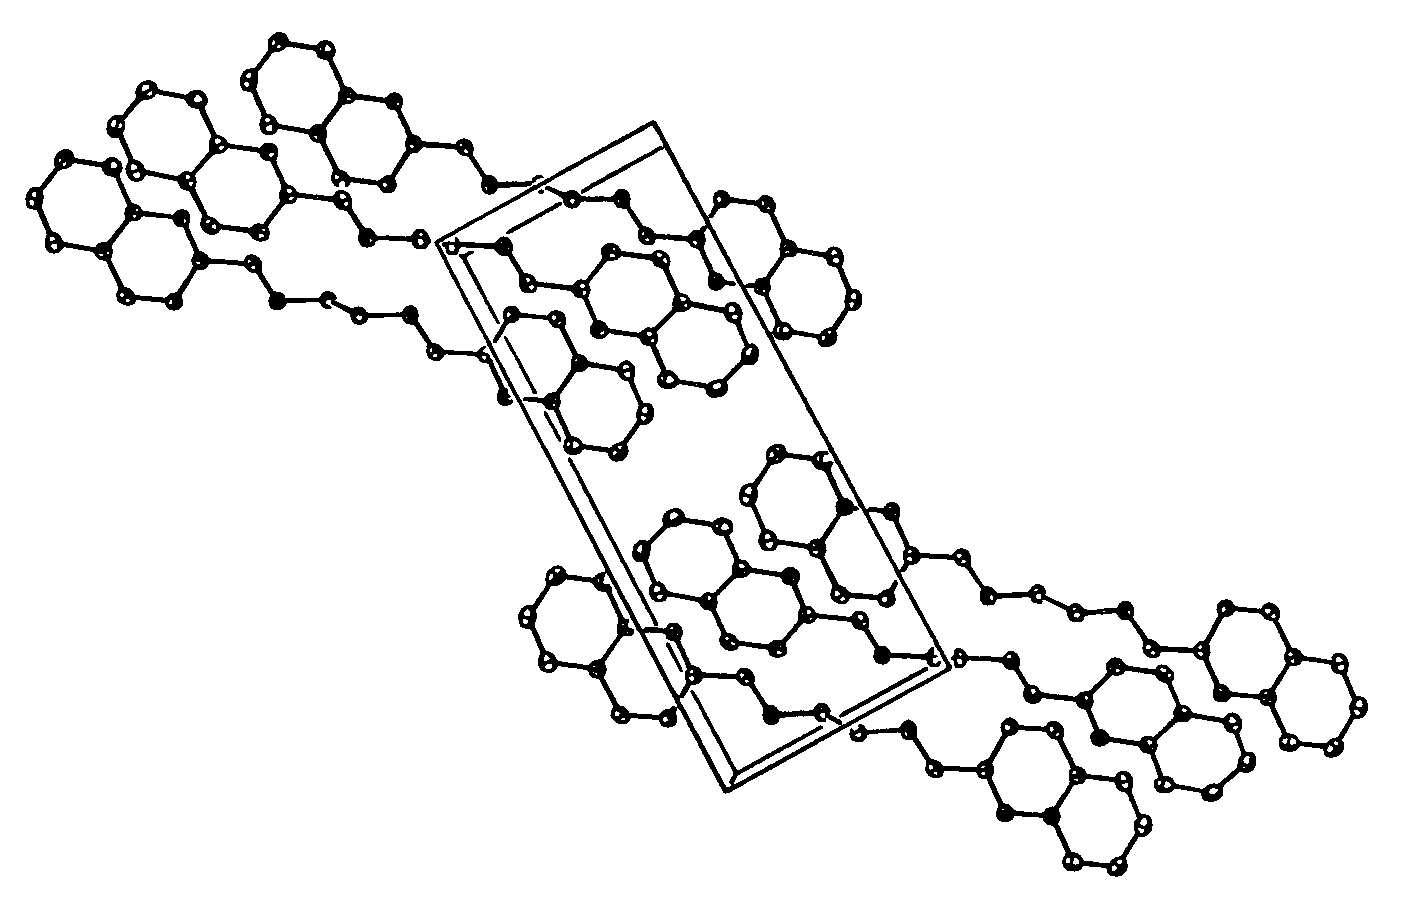


**Fig. 1s**  View of the crystal structure of ligand **1**, showing the parallel alignment of the extended molecules in the lattice.

**
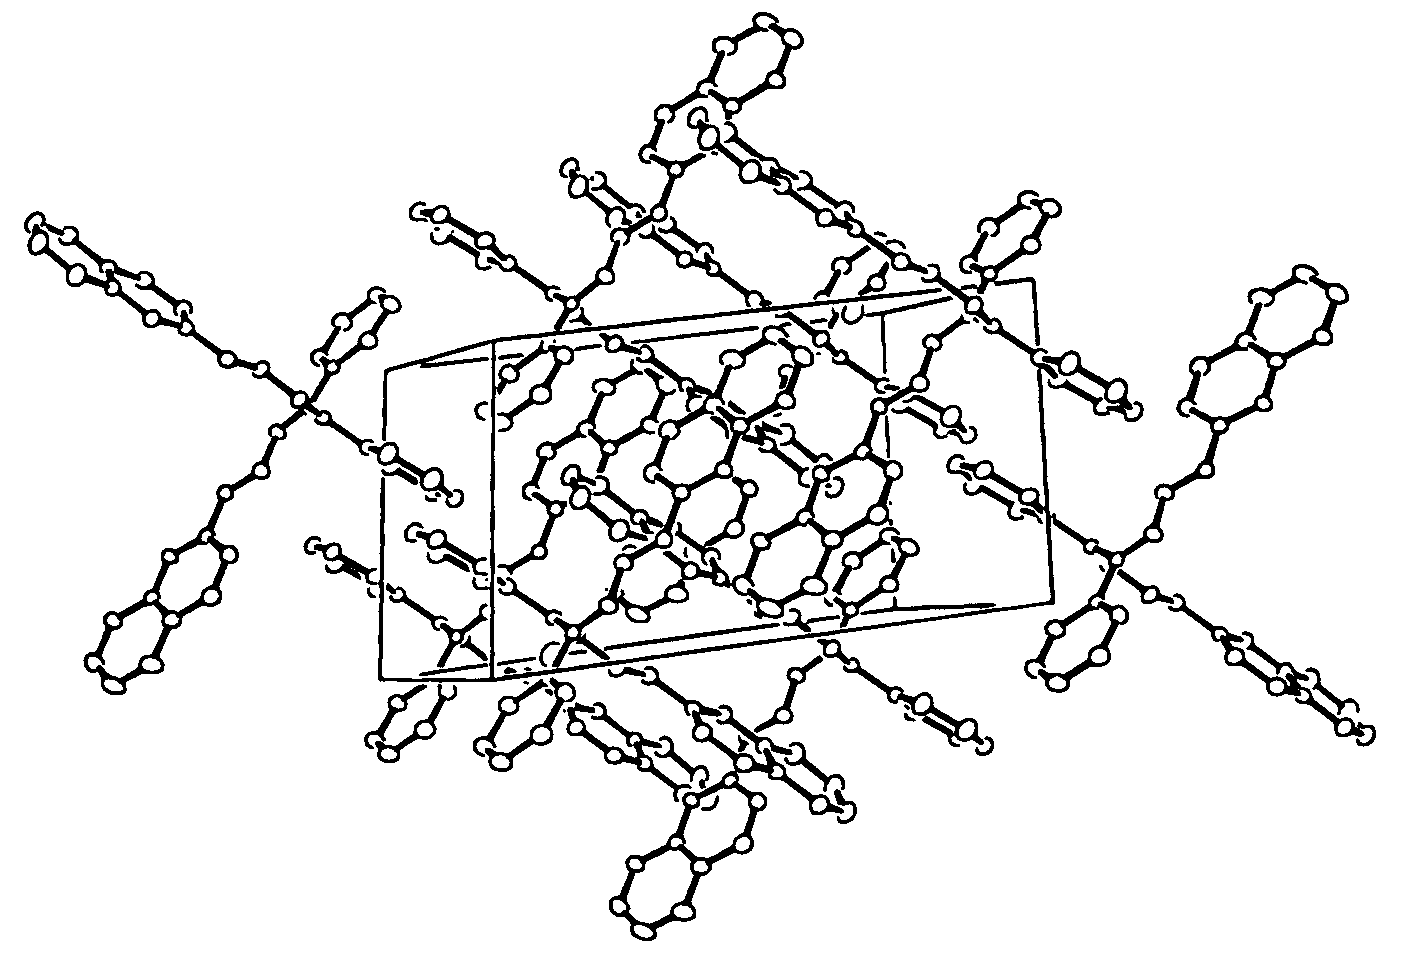
**

**Fig. 2s**  View of the crystal structure of ligand **2**. Note the parallel overlapping arrangements of the aromatic fragments in the lattice.

**
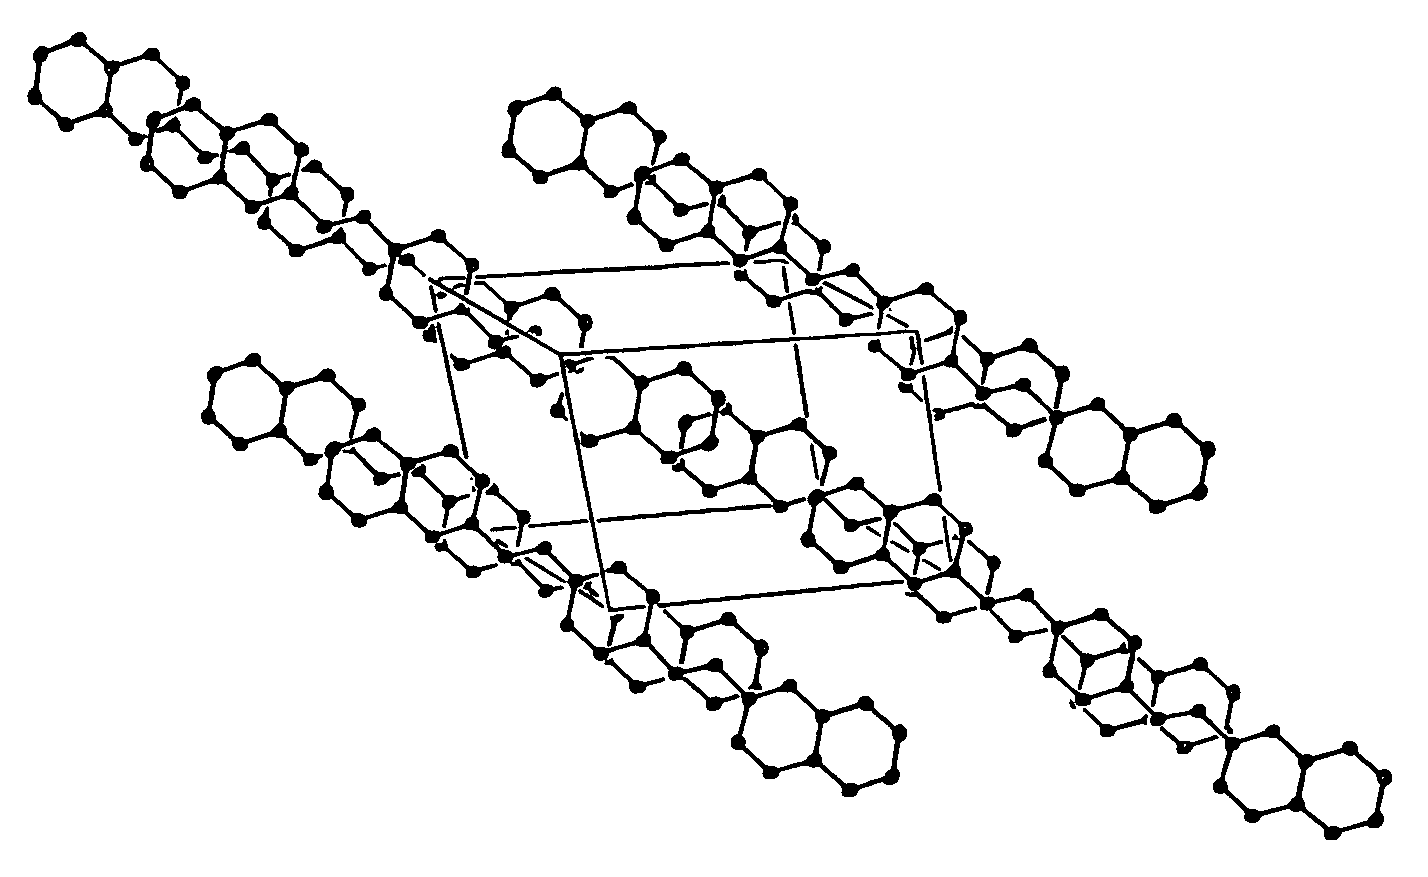
**

**Fig. 3s**  View of the crystal structure of ligand **3**.

The chloroform solvent species are located between the aromatic zones (viewed edge-on) of the structure.
